# Supplementary material
Source: publisher figshare collection journal article supplement (https://acs.figshare.com/ndownloader/files/3939316)
Supplement: Supplementary file 1 [file 3939316]

## Sheet: TableS4
Table S4. Prediction of Eukaryotic Protein Kinases and Binding Motifs by SCANSITE at High Stringency (0.2%), Medium Stringency (1.0%) and Low Stringency (5.0%) within the identified Phosphorylated Sites (p > 0.75) of Phaeodactylum tricornutum
The explanation of the each column is available on the website (http://stjuderesearch.org/scansite/tutorials.php)
Accession	Calculated Score	Percentile rank	Motif	Motif family	Position	Sequence	Surface accessibility
13	0.595	0.02146	Shc PTB (Shc_PTB)	Phosphotyrosine binding group (PTB)	Y1966	DLILPPMyTGKSSPI	1.5694
1287	0.49	0.03924	Casein Kinase 1 (Casn_Kin1)	Acidophilic serine/threonine kinase group (Acid_ST_kin)	T416	VRDEEARtMIATGNF	0.4586
1378	0.612	0.00809	AMP_Kinase (AMPK)	Basophilic serine/threonine kinase (Baso_ST_kin)	T24	GDLAKRKtYPALLAL	3.1709
1378	0.663	0.03255	Aurora A (AuroA)	Basophilic serine/threonine kinase (Baso_ST_kin)	T24	GDLAKRKtYPALLAL	3.1709
1378	0.552	0.00824	Aurora B (AuroB)	Basophilic serine/threonine kinase (Baso_ST_kin)	T24	GDLAKRKtYPALLAL	3.1709
1378	0.496	0.02713	PKC mu (PKC_mu)	Basophilic serine/threonine kinase (Baso_ST_kin)	T24	GDLAKRKtYPALLAL	3.1709
1378	0.26	0.00052	Protein Kinase A (PKA_Kin)	Basophilic serine/threonine kinase (Baso_ST_kin)	T24	GDLAKRKtYPALLAL	3.1709
1378	0.422	0.00668	14-3-3 Mode 1 (1433_m1)	Phosphoserine/threonine binding group (pST_bind)	T24	GDLAKRKtYPALLAL	3.1709
1415	0.641	0.0213	Akt Kinase (Akt_Kin)	Basophilic serine/threonine kinase (Baso_ST_kin)	S206	AGAGRSSsGNSDGGA	1.2215
1415	0.551	0.0259	14-3-3 Mode 1 (1433_m1)	Phosphoserine/threonine binding group (pST_bind)	S206	AGAGRSSsGNSDGGA	1.2215
1448	0.532	0.01094	GSK3 Kinase (GSK3_Kin)	Acidophilic serine/threonine kinase group (Acid_ST_kin)	S344	PAFSPGGsRGTTPGG	0.8413
1448	0.448	0.00671	GSK3-improved (GSK3b)	Acidophilic serine/threonine kinase group (Acid_ST_kin)	S344	PAFSPGGsRGTTPGG	0.8413
1448	0.563	0.01622	Erk1 Kinase (Erk1_Kin)	Proline-dependent serine/threonine kinase group (Pro_ST_kin)	T335	IQEAASAtPPAFSPG	1.0815
1471	0.685	0.02508	AMP_Kinase (AMPK)	Basophilic serine/threonine kinase (Baso_ST_kin)	S88	SKLDRRNsLQEESVL	2.4846
1471	0.496	0.00311	Akt Kinase (Akt_Kin)	Basophilic serine/threonine kinase (Baso_ST_kin)	S88	SKLDRRNsLQEESVL	2.4846
1471	0.5	0.00515	Aurora A (AuroA)	Basophilic serine/threonine kinase (Baso_ST_kin)	S88	SKLDRRNsLQEESVL	2.4846
1471	0.5	0.00515	Aurora A (AuroA)	Basophilic serine/threonine kinase (Baso_ST_kin)	S88	SKLDRRNsLQEESVL	2.4846
1471	0.415	0.00526	PKC epsilon (PKC_epsilon)	Basophilic serine/threonine kinase (Baso_ST_kin)	S88	SKLDRRNsLQEESVL	2.4846
1471	0.415	0.00526	PKC epsilon (PKC_epsilon)	Basophilic serine/threonine kinase (Baso_ST_kin)	S88	SKLDRRNsLQEESVL	2.4846
1471	0.583	0.03504	14-3-3 Mode 1 (1433_m1)	Phosphoserine/threonine binding group (pST_bind)	S88	SKLDRRNsLQEESVL	2.4846
10052	0.672	0.02681	Aurora B (AuroB)	Basophilic serine/threonine kinase (Baso_ST_kin)	S22	LVTTDRQsGFDRMLA	1.4907
10701	0.633	0.01133	AMP_Kinase (AMPK)	Basophilic serine/threonine kinase (Baso_ST_kin)	T236	DEMKKHGtMPEVSAA	1.1803
10701	0.477	0.02382	PKC epsilon (PKC_epsilon)	Basophilic serine/threonine kinase (Baso_ST_kin)	T236	DEMKKHGtMPEVSAA	1.1803
10701	0.604	0.04544	Protein Kinase A (PKA_Kin)	Basophilic serine/threonine kinase (Baso_ST_kin)	T236	DEMKKHGtMPEVSAA	1.1803
10701	0.445	0.00857	14-3-3 Mode 1 (1433_m1)	Phosphoserine/threonine binding group (pST_bind)	T236	DEMKKHGtMPEVSAA	1.1803
10701	0.518	0.03467	PKC alpha/beta/gamma (PKC_common)	Basophilic serine/threonine kinase (Baso_ST_kin)	S245	PEVSAAAsFRSGALN	0.7124
12613	0.408	0.00293	Casein Kinase 2 (Casn_Kin2)	Acidophilic serine/threonine kinase group (Acid_ST_kin)	S944	KAGEALDsEEEELAF	2.1969
12613	0.556	0.01751	DNA PK (DNA_PK)	DNA damage kinase group (DNA_dam_kin)	S944	KAGEALDsEEEELAF	2.1969
12978	0.613	0.01529	Akt Kinase (Akt_Kin)	Basophilic serine/threonine kinase (Baso_ST_kin)	S959	NKAVRKMsIALNSVV	0.355
12978	0.48	0.00402	Aurora A (AuroA)	Basophilic serine/threonine kinase (Baso_ST_kin)	S959	NKAVRKMsIALNSVV	0.355
12978	0.514	0.00534	Aurora B (AuroB)	Basophilic serine/threonine kinase (Baso_ST_kin)	S959	NKAVRKMsIALNSVV	0.355
12978	0.531	0.01712	Calmodulin dependent Kinase 2 (Cam_Kin2)	Basophilic serine/threonine kinase (Baso_ST_kin)	S959	NKAVRKMsIALNSVV	0.355
12978	0.382	0.00194	PKC epsilon (PKC_epsilon)	Basophilic serine/threonine kinase (Baso_ST_kin)	S959	NKAVRKMsIALNSVV	0.355
12978	0.505	0.03289	PKC mu (PKC_mu)	Basophilic serine/threonine kinase (Baso_ST_kin)	S959	NKAVRKMsIALNSVV	0.355
12978	0.379	0.00384	Protein Kinase A (PKA_Kin)	Basophilic serine/threonine kinase (Baso_ST_kin)	S959	NKAVRKMsIALNSVV	0.355
13135	0.552	0.02459	Protein Kinase A (PKA_Kin)	Basophilic serine/threonine kinase (Baso_ST_kin)	S451	DISHHRGsAYDLSGP	1.5736
13135	0.452	0.03214	PLK1 Kinase (PLK1)	Acidophilic serine/threonine kinase group (Acid_ST_kin)	S446	EEVGLDIsHHRGSAY	1.3038
13267	0.501	0.00755	ATM Kinase (ATM_Kin)	DNA damage kinase group (DNA_dam_kin)	T91	KERNMLLtEQQLSRR	1.1683
13724	0.356	0.00129	Casein Kinase 2 (Casn_Kin2)	Acidophilic serine/threonine kinase group (Acid_ST_kin)	S1182	LSVAAAEsDESEEDE	2.0825
13724	0.452	0.00582	Casein Kinase 2 (Casn_Kin2)	Acidophilic serine/threonine kinase group (Acid_ST_kin)	S1185	AAAESDEsEEDE***	4.4487
13738	0.479	0.01874	PKC mu (PKC_mu)	Basophilic serine/threonine kinase (Baso_ST_kin)	T382	SLLSAELtKLFDFRP	0.6746
14247	0.645	0.0278	p85 SH2 (p85_SH2)	Src homology 2 group (SH2)	Y19	SKPLSNTyHFMRVGT	1.0091
14420	0.524	0.01772	Casein Kinase 2 (Casn_Kin2)	Acidophilic serine/threonine kinase group (Acid_ST_kin)	S160	DFGWDSFsDEEKARQ	1.785
14420	0.767	0.01667	PDK1 Binding (PDK1_Bind)	Kinase binding site group (Kin_bind)	S160	DFGWDSFsDEEKARQ	1.785
14432	0.4	0.02057	PLK1 Kinase (PLK1)	Acidophilic serine/threonine kinase group (Acid_ST_kin)	S165	IQGEPNVsYICSRYY	0.2241
14487	0.711	0.03603	AMP_Kinase (AMPK)	Basophilic serine/threonine kinase (Baso_ST_kin)	S33	SALKSSAsNDASMSM	1.1714
14548	0.572	0.03375	Calmodulin dependent Kinase 2 (Cam_Kin2)	Basophilic serine/threonine kinase (Baso_ST_kin)	S68	WDTAGQEsFRSITRS	2.0935
14548	0.516	0.03322	PKC alpha/beta/gamma (PKC_common)	Basophilic serine/threonine kinase (Baso_ST_kin)	S68	WDTAGQEsFRSITRS	2.0935
14771	0.569	0.00381	AMP_Kinase (AMPK)	Basophilic serine/threonine kinase (Baso_ST_kin)	T49	IHMKRSGtTLARVTV	0.5274
14771	0.567	0.03016	14-3-3 Mode 1 (1433_m1)	Phosphoserine/threonine binding group (pST_bind)	T49	IHMKRSGtTLARVTV	0.5274
16558	0.473	0.00813	Casein Kinase 2 (Casn_Kin2)	Acidophilic serine/threonine kinase group (Acid_ST_kin)	S82	RKMKDTDsEEEILEA	3.8446
16558	0.447	0.00299	DNA PK (DNA_PK)	DNA damage kinase group (DNA_dam_kin)	S82	RKMKDTDsEEEILEA	3.8446
17024	0.456	0.01064	PKC alpha/beta/gamma (PKC_common)	Basophilic serine/threonine kinase (Baso_ST_kin)	S10	KHPKLKPsIVRRRLN	0.9678
17024	0.522	0.02042	PKC zeta (PKC_zeta)	Basophilic serine/threonine kinase (Baso_ST_kin)	S10	KHPKLKPsIVRRRLN	0.9678
17158	0.518	0.01637	Casein Kinase 2 (Casn_Kin2)	Acidophilic serine/threonine kinase group (Acid_ST_kin)	S43	RVLDRDDsELDKHDD	2.0428
17158	0.648	0.00581	Clk2 Kinase (Clk2_Kin)	Basophilic serine/threonine kinase (Baso_ST_kin)	S43	RVLDRDDsELDKHDD	2.0428
17158	0.611	0.04551	14-3-3 Mode 1 (1433_m1)	Phosphoserine/threonine binding group (pST_bind)	S43	RVLDRDDsELDKHDD	2.0428
17337	0.589	0.0448	Calmodulin dependent Kinase 2 (Cam_Kin2)	Basophilic serine/threonine kinase (Baso_ST_kin)	S18	SQAFSGEsLDKATAH	1.4497
17626	0.946	0.03965	PDK1 Binding (PDK1_Bind)	Kinase binding site group (Kin_bind)	T95	QNPFQKHtNADDVSS	2.5357
17711	0.63	0.02343	Aurora A (AuroA)	Basophilic serine/threonine kinase (Baso_ST_kin)	T667	IVVDKTYtLCGTPEY	0.3272
17746	0.48	0.03234	Casein Kinase 1 (Casn_Kin1)	Acidophilic serine/threonine kinase group (Acid_ST_kin)	S317	TRSTSATsSKSVDGP	1.6081
17746	0.755	0.01857	Clk2 Kinase (Clk2_Kin)	Basophilic serine/threonine kinase (Baso_ST_kin)	S317	TRSTSATsSKSVDGP	1.6081
17746	0.493	0.02184	PKC alpha/beta/gamma (PKC_common)	Basophilic serine/threonine kinase (Baso_ST_kin)	S317	TRSTSATsSKSVDGP	1.6081
17746	0.492	0.04651	PKC delta PKC_delta)	Basophilic serine/threonine kinase (Baso_ST_kin)	S317	TRSTSATsSKSVDGP	1.6081
17746	0.486	0.0367	Casein Kinase 1 (Casn_Kin1)	Acidophilic serine/threonine kinase group (Acid_ST_kin)	S320	TSATSSKsVDGPVPA	1.0096
17746	0.628	0.04866	DNA PK (DNA_PK)	DNA damage kinase group (DNA_dam_kin)	S320	TSATSSKsVDGPVPA	1.0096
17938	0.714	0.03788	AMP_Kinase (AMPK)	Basophilic serine/threonine kinase (Baso_ST_kin)	S91	SGHYRRGsSPVMITD	0.9155
17938	0.653	0.0245	Akt Kinase (Akt_Kin)	Basophilic serine/threonine kinase (Baso_ST_kin)	S91	SGHYRRGsSPVMITD	0.9155
17938	0.622	0.02168	Aurora A (AuroA)	Basophilic serine/threonine kinase (Baso_ST_kin)	S91	SGHYRRGsSPVMITD	0.9155
17938	0.605	0.01299	Aurora B (AuroB)	Basophilic serine/threonine kinase (Baso_ST_kin)	S91	SGHYRRGsSPVMITD	0.9155
17938	0.432	0.0069	Protein Kinase A (PKA_Kin)	Basophilic serine/threonine kinase (Baso_ST_kin)	S91	SGHYRRGsSPVMITD	0.9155
17938	0.391	0.0046	14-3-3 Mode 1 (1433_m1)	Phosphoserine/threonine binding group (pST_bind)	S91	SGHYRRGsSPVMITD	0.9155
17938	0.531	0.01897	Protein Kinase A (PKA_Kin)	Basophilic serine/threonine kinase (Baso_ST_kin)	S92	GHYRRGSsPVMITDA	0.4626
17938	0.676	0.04864	CDK1 motif 1-[ST]Px[KR]x (CDK1_1)	Proline-dependent serine/threonine kinase group (Pro_ST_kin)	S92	GHYRRGSsPVMITDA	0.4626
17938	0.658	0.04873	CDK1 motif 2-[ST]PxxK (CDK1_2)	Proline-dependent serine/threonine kinase group (Pro_ST_kin)	S92	GHYRRGSsPVMITDA	0.4626
18005	0.47	0.03642	PLK1 Kinase (PLK1)	Acidophilic serine/threonine kinase group (Acid_ST_kin)	S14	KSGISNTsSAGKTNR	0.9917
18198	0.441	0.00489	Casein Kinase 2 (Casn_Kin2)	Acidophilic serine/threonine kinase group (Acid_ST_kin)	S59	TNPLGDSsSDDDDPA	2.5687
18198	0.493	0.04204	PLK1 Kinase (PLK1)	Acidophilic serine/threonine kinase group (Acid_ST_kin)	S59	TNPLGDSsSDDDDPA	2.5687
18198	0.39	0.00221	Casein Kinase 2 (Casn_Kin2)	Acidophilic serine/threonine kinase group (Acid_ST_kin)	S60	NPLGDSSsDDDDPAA	2.5687
18198	0.604	0.03529	DNA PK (DNA_PK)	DNA damage kinase group (DNA_dam_kin)	S60	NPLGDSSsDDDDPAA	2.5687
18839	0.584	0.04479	Casein Kinase 2 (Casn_Kin2)	Acidophilic serine/threonine kinase group (Acid_ST_kin)	S563	TRNDSFDsEELNFPN	1.0984
18839	0.618	0.04271	DNA PK (DNA_PK)	DNA damage kinase group (DNA_dam_kin)	S563	TRNDSFDsEELNFPN	1.0984
18839	0.584	0.04473	Casein Kinase 2 (Casn_Kin2)	Acidophilic serine/threonine kinase group (Acid_ST_kin)	S560	IHRTRNDsFDSEELN	1.6598
18839	0.298	0.00429	PLK1 Kinase (PLK1)	Acidophilic serine/threonine kinase group (Acid_ST_kin)	S560	IHRTRNDsFDSEELN	1.6598
18839	0.424	0.00095	Akt Kinase (Akt_Kin)	Basophilic serine/threonine kinase (Baso_ST_kin)	S560	IHRTRNDsFDSEELN	1.6598
18839	0.654	0.02981	Aurora A (AuroA)	Basophilic serine/threonine kinase (Baso_ST_kin)	S560	IHRTRNDsFDSEELN	1.6598
18839	0.481	0.00666	Calmodulin dependent Kinase 2 (Cam_Kin2)	Basophilic serine/threonine kinase (Baso_ST_kin)	S560	IHRTRNDsFDSEELN	1.6598
18839	0.529	0.00191	Clk2 Kinase (Clk2_Kin)	Basophilic serine/threonine kinase (Baso_ST_kin)	S560	IHRTRNDsFDSEELN	1.6598
19326	0.677	0.03762	Aurora A (AuroA)	Basophilic serine/threonine kinase (Baso_ST_kin)	T40	GTSNHRStHSQGMES	2.7415
19589	0.54	0.00216	AMP_Kinase (AMPK)	Basophilic serine/threonine kinase (Baso_ST_kin)	S23	TGMRRVDsEASDMSE	0.8925
19589	0.68	0.0328	Akt Kinase (Akt_Kin)	Basophilic serine/threonine kinase (Baso_ST_kin)	S23	TGMRRVDsEASDMSE	0.8925
19589	0.774	0.02287	Clk2 Kinase (Clk2_Kin)	Basophilic serine/threonine kinase (Baso_ST_kin)	S23	TGMRRVDsEASDMSE	0.8925
19589	0.611	0.0453	14-3-3 Mode 1 (1433_m1)	Phosphoserine/threonine binding group (pST_bind)	S23	TGMRRVDsEASDMSE	0.8925
19589	0.511	0.01459	Casein Kinase 2 (Casn_Kin2)	Acidophilic serine/threonine kinase group (Acid_ST_kin)	S26	RRVDSEAsDMSELGN	1.19
19589	0.685	0.00858	Clk2 Kinase (Clk2_Kin)	Basophilic serine/threonine kinase (Baso_ST_kin)	S26	RRVDSEAsDMSELGN	1.19
19703	0.57	0.0241	ATM Kinase (ATM_Kin)	DNA damage kinase group (DNA_dam_kin)	S28	RPTDTAFsQQRIQAW	1.5782
19703	0.56	0.01847	DNA PK (DNA_PK)	DNA damage kinase group (DNA_dam_kin)	S28	RPTDTAFsQQRIQAW	1.5782
19850	0.522	0.04745	Fgr Kinase (Fgr_Kin)	Tyrosine kinase group (Y_kin)	Y33	PLDPQPDyPQLRESF	2.0477
20101	0.671	0.02991	Akt Kinase (Akt_Kin)	Basophilic serine/threonine kinase (Baso_ST_kin)	S14	NRRIKSRsKSPDIND	3.3405
20101	0.78	0.02444	Clk2 Kinase (Clk2_Kin)	Basophilic serine/threonine kinase (Baso_ST_kin)	S14	NRRIKSRsKSPDIND	3.3405
20101	0.541	0.02363	14-3-3 Mode 1 (1433_m1)	Phosphoserine/threonine binding group (pST_bind)	S14	NRRIKSRsKSPDIND	3.3405
20303	0.587	0.04561	GSK3-improved (GSK3b)	Acidophilic serine/threonine kinase group (Acid_ST_kin)	S78	RRSYRDRsYSPSPPG	3.2615
20303	0.372	0.01473	PLK1 Kinase (PLK1)	Acidophilic serine/threonine kinase group (Acid_ST_kin)	S78	RRSYRDRsYSPSPPG	3.2615
20303	0.575	0.00957	Akt Kinase (Akt_Kin)	Basophilic serine/threonine kinase (Baso_ST_kin)	S78	RRSYRDRsYSPSPPG	3.2615
20303	0.559	0.02771	Calmodulin dependent Kinase 2 (Cam_Kin2)	Basophilic serine/threonine kinase (Baso_ST_kin)	S78	RRSYRDRsYSPSPPG	3.2615
20303	0.598	0.00351	Clk2 Kinase (Clk2_Kin)	Basophilic serine/threonine kinase (Baso_ST_kin)	S78	RRSYRDRsYSPSPPG	3.2615
20303	0.527	0.01805	Protein Kinase A (PKA_Kin)	Basophilic serine/threonine kinase (Baso_ST_kin)	S78	RRSYRDRsYSPSPPG	3.2615
20303	0.534	0.00262	PDK1 Binding (PDK1_Bind)	Kinase binding site group (Kin_bind)	S78	RRSYRDRsYSPSPPG	3.2615
20303	0.425	0.00691	14-3-3 Mode 1 (1433_m1)	Phosphoserine/threonine binding group (pST_bind)	S78	RRSYRDRsYSPSPPG	3.2615
20303	0.589	0.02919	GSK3 Kinase (GSK3_Kin)	Acidophilic serine/threonine kinase group (Acid_ST_kin)	S82	RDRSYSPsPPGPRRS	1.5058
20303	0.602	0.03578	CDK1 motif 1-[ST]Px[KR]x (CDK1_1)	Proline-dependent serine/threonine kinase group (Pro_ST_kin)	S82	RDRSYSPsPPGPRRS	1.5058
20303	0.58	0.03531	CDK1 motif 2-[ST]PxxK (CDK1_2)	Proline-dependent serine/threonine kinase group (Pro_ST_kin)	S82	RDRSYSPsPPGPRRS	1.5058
20303	0.559	0.01619	Cdc2 Kinase (Cdc2_Kin)	Proline-dependent serine/threonine kinase group (Pro_ST_kin)	S82	RDRSYSPsPPGPRRS	1.5058
20303	0.515	0.01436	Cdk5 Kinase (Cdk5_Kin)	Proline-dependent serine/threonine kinase group (Pro_ST_kin)	S82	RDRSYSPsPPGPRRS	1.5058
20303	0.474	0.00394	Erk1 Kinase (Erk1_Kin)	Proline-dependent serine/threonine kinase group (Pro_ST_kin)	S82	RDRSYSPsPPGPRRS	1.5058
20303	0.357	0.00028	Akt Kinase (Akt_Kin)	Basophilic serine/threonine kinase (Baso_ST_kin)	S80	SYRDRSYsPSPPGPR	2.0663
20303	0.77	0.02193	Clk2 Kinase (Clk2_Kin)	Basophilic serine/threonine kinase (Baso_ST_kin)	S80	SYRDRSYsPSPPGPR	2.0663
20303	0.933	0.03363	PDK1 Binding (PDK1_Bind)	Kinase binding site group (Kin_bind)	S80	SYRDRSYsPSPPGPR	2.0663
20303	0.427	0.00699	14-3-3 Mode 1 (1433_m1)	Phosphoserine/threonine binding group (pST_bind)	S80	SYRDRSYsPSPPGPR	2.0663
20303	0.433	0.00864	CDK1 motif 1-[ST]Px[KR]x (CDK1_1)	Proline-dependent serine/threonine kinase group (Pro_ST_kin)	S80	SYRDRSYsPSPPGPR	2.0663
20303	0.401	0.00547	CDK1 motif 2-[ST]PxxK (CDK1_2)	Proline-dependent serine/threonine kinase group (Pro_ST_kin)	S80	SYRDRSYsPSPPGPR	2.0663
20303	0.651	0.04238	Cdc2 Kinase (Cdc2_Kin)	Proline-dependent serine/threonine kinase group (Pro_ST_kin)	S80	SYRDRSYsPSPPGPR	2.0663
20303	0.615	0.04078	Cdk5 Kinase (Cdk5_Kin)	Proline-dependent serine/threonine kinase group (Pro_ST_kin)	S80	SYRDRSYsPSPPGPR	2.0663
20303	0.53	0.01018	Erk1 Kinase (Erk1_Kin)	Proline-dependent serine/threonine kinase group (Pro_ST_kin)	S80	SYRDRSYsPSPPGPR	2.0663
20422	0.531	0.02	Casein Kinase 2 (Casn_Kin2)	Acidophilic serine/threonine kinase group (Acid_ST_kin)	S688	VAAEKEIsEEMDKAD	1.1066
20567	0.562	0.02894	Calmodulin dependent Kinase 2 (Cam_Kin2)	Basophilic serine/threonine kinase (Baso_ST_kin)	S16	PMVERQEsSQSGGVL	2.8648
21196	0.515	0.03276	PKC alpha/beta/gamma (PKC_common)	Basophilic serine/threonine kinase (Baso_ST_kin)	T12	FVIAVKPtIFEKTSS	1.0751
21196	0.461	0.02611	PKC delta PKC_delta)	Basophilic serine/threonine kinase (Baso_ST_kin)	T12	FVIAVKPtIFEKTSS	1.0751
21196	0.431	0.0077	PKC epsilon (PKC_epsilon)	Basophilic serine/threonine kinase (Baso_ST_kin)	T12	FVIAVKPtIFEKTSS	1.0751
21845	0.411	0.00308	Casein Kinase 2 (Casn_Kin2)	Acidophilic serine/threonine kinase group (Acid_ST_kin)	S128	YTAELDEsDFETAEK	2.2244
22092	0.5	0.01232	Casein Kinase 2 (Casn_Kin2)	Acidophilic serine/threonine kinase group (Acid_ST_kin)	S8	MVDEKELsDAESVGS	1.2815
22092	0.365	0.0026	Casein Kinase 1 (Casn_Kin1)	Acidophilic serine/threonine kinase group (Acid_ST_kin)	S12	KELSDAEsVGSEAEE	0.5289
22092	0.468	0.00748	Casein Kinase 2 (Casn_Kin2)	Acidophilic serine/threonine kinase group (Acid_ST_kin)	S12	KELSDAEsVGSEAEE	0.5289
22923	0.587	0.04363	Calmodulin dependent Kinase 2 (Cam_Kin2)	Basophilic serine/threonine kinase (Baso_ST_kin)	S361	PAAKKVRsQSSASAV	1.3885
22923	0.589	0.04794	Casein Kinase 2 (Casn_Kin2)	Acidophilic serine/threonine kinase group (Acid_ST_kin)	T373	SAVADGLtSHKEAQS	0.9843
23574	0.602	0.00687	AMP_Kinase (AMPK)	Basophilic serine/threonine kinase (Baso_ST_kin)	T129	TVINTNPtVLRLQDK	1.0239
24266	0.727	0.04402	Aurora B (AuroB)	Basophilic serine/threonine kinase (Baso_ST_kin)	S418	SMFGKAPsSGNSFGS	1.0625
31426	0.455	0.01476	Fgr Kinase (Fgr_Kin)	Tyrosine kinase group (Y_kin)	Y675	VASNDSEyGQLKEAV	1.1779
31426	0.536	0.02133	Lck Kinase (Lck_Kin)	Tyrosine kinase group (Y_kin)	Y675	VASNDSEyGQLKEAV	1.1779
31426	0.569	0.02586	Src Kinase (Src_Kin)	Tyrosine kinase group (Y_kin)	Y675	VASNDSEyGQLKEAV	1.1779
31663	0.578	0.04087	Casein Kinase 2 (Casn_Kin2)	Acidophilic serine/threonine kinase group (Acid_ST_kin)	S128	DDAKYSHsDLEDEDR	1.3357
31677	0.576	0.02353	DNA PK (DNA_PK)	DNA damage kinase group (DNA_dam_kin)	S14	TATSEIDsAESLRSK	0.8429
31733	0.476	0.00854	Casein Kinase 2 (Casn_Kin2)	Acidophilic serine/threonine kinase group (Acid_ST_kin)	T474	ADLTALEtDSSEDES	1.4166
31733	0.41	0.00839	Casein Kinase 1 (Casn_Kin1)	Acidophilic serine/threonine kinase group (Acid_ST_kin)	S481	TDSSEDEsIPFKKSG	0.8336
31733	0.578	0.04054	Casein Kinase 2 (Casn_Kin2)	Acidophilic serine/threonine kinase group (Acid_ST_kin)	S481	TDSSEDEsIPFKKSG	0.8336
31733	0.393	0.01895	PLK1 Kinase (PLK1)	Acidophilic serine/threonine kinase group (Acid_ST_kin)	S481	TDSSEDEsIPFKKSG	0.8336
31814	0.295	0.00046	Casein Kinase 2 (Casn_Kin2)	Acidophilic serine/threonine kinase group (Acid_ST_kin)	T203	VNKADDGtDDSEVSV	2.0428
31814	0.47	0.02784	Casein Kinase 1 (Casn_Kin1)	Acidophilic serine/threonine kinase group (Acid_ST_kin)	S209	GTDDSEVsVNKLDKS	0.9785
31814	0.452	0.03212	PLK1 Kinase (PLK1)	Acidophilic serine/threonine kinase group (Acid_ST_kin)	S209	GTDDSEVsVNKLDKS	0.9785
31911	0.6	0.01314	Akt Kinase (Akt_Kin)	Basophilic serine/threonine kinase (Baso_ST_kin)	S368	SGLSRGAsIESSASA	0.4995
31911	0.575	0.03527	Calmodulin dependent Kinase 2 (Cam_Kin2)	Basophilic serine/threonine kinase (Baso_ST_kin)	S368	SGLSRGAsIESSASA	0.4995
31911	0.824	0.03986	Clk2 Kinase (Clk2_Kin)	Basophilic serine/threonine kinase (Baso_ST_kin)	S368	SGLSRGAsIESSASA	0.4995
31911	0.515	0.03276	PKC alpha/beta/gamma (PKC_common)	Basophilic serine/threonine kinase (Baso_ST_kin)	S368	SGLSRGAsIESSASA	0.4995
31911	0.501	0.01343	Protein Kinase A (PKA_Kin)	Basophilic serine/threonine kinase (Baso_ST_kin)	S368	SGLSRGAsIESSASA	0.4995
31911	0.617	0.04859	ATM Kinase (ATM_Kin)	DNA damage kinase group (DNA_dam_kin)	S368	SGLSRGAsIESSASA	0.4995
31911	0.599	0.03306	DNA PK (DNA_PK)	DNA damage kinase group (DNA_dam_kin)	S368	SGLSRGAsIESSASA	0.4995
31934	0.559	0.02771	Calmodulin dependent Kinase 2 (Cam_Kin2)	Basophilic serine/threonine kinase (Baso_ST_kin)	T576	GYEKFQStLPSRALA	1.3117
31934	0.526	0.03943	PKC alpha/beta/gamma (PKC_common)	Basophilic serine/threonine kinase (Baso_ST_kin)	T576	GYEKFQStLPSRALA	1.3117
31972	0.569	0.00381	AMP_Kinase (AMPK)	Basophilic serine/threonine kinase (Baso_ST_kin)	S794	SDGKRRPsAIDLTAL	1.0999
31972	0.667	0.02874	Akt Kinase (Akt_Kin)	Basophilic serine/threonine kinase (Baso_ST_kin)	S794	SDGKRRPsAIDLTAL	1.0999
31972	0.604	0.01796	Aurora A (AuroA)	Basophilic serine/threonine kinase (Baso_ST_kin)	S794	SDGKRRPsAIDLTAL	1.0999
31972	0.528	0.00633	Aurora B (AuroB)	Basophilic serine/threonine kinase (Baso_ST_kin)	S794	SDGKRRPsAIDLTAL	1.0999
31972	0.34	0.0023	Protein Kinase A (PKA_Kin)	Basophilic serine/threonine kinase (Baso_ST_kin)	S794	SDGKRRPsAIDLTAL	1.0999
32022	0.582	0.04325	Casein Kinase 2 (Casn_Kin2)	Acidophilic serine/threonine kinase group (Acid_ST_kin)	T348	GKAPPSEtGVDEVAQ	0.9415
32105	0.454	0.0225	PKC delta PKC_delta)	Basophilic serine/threonine kinase (Baso_ST_kin)	S236	KALAKAFsSSGGSFL	0.4775
32105	0.415	0.00951	Casein Kinase 1 (Casn_Kin1)	Acidophilic serine/threonine kinase group (Acid_ST_kin)	S241	AFSSSGGsFLYVDKE	0.3365
32105	0.474	0.03402	PKC delta PKC_delta)	Basophilic serine/threonine kinase (Baso_ST_kin)	S241	AFSSSGGsFLYVDKE	0.3365
32105	0.51	0.0474	PKC epsilon (PKC_epsilon)	Basophilic serine/threonine kinase (Baso_ST_kin)	S241	AFSSSGGsFLYVDKE	0.3365
32105	0.493	0.02509	PKC mu (PKC_mu)	Basophilic serine/threonine kinase (Baso_ST_kin)	S241	AFSSSGGsFLYVDKE	0.3365
32105	0.487	0.04354	PDGFR Kin (PDGFR_Kin)	Tyrosine kinase group (Y_kin)	Y244	SSGGSFLyVDKEADD	0.6356
32134	0.616	0.04818	ATM Kinase (ATM_Kin)	DNA damage kinase group (DNA_dam_kin)	T292	ATEENADtVDQKSPA	1.1977
32134	0.554	0.02833	Casein Kinase 2 (Casn_Kin2)	Acidophilic serine/threonine kinase group (Acid_ST_kin)	S301	DQKSPANsETSETDK	1.7354
32172	0.719	0.04957	Akt Kinase (Akt_Kin)	Basophilic serine/threonine kinase (Baso_ST_kin)	S581	SNPSRGLsDASMDVD	0.5667
32172	0.339	0.00908	PLK1 Kinase (PLK1)	Acidophilic serine/threonine kinase group (Acid_ST_kin)	S584	SRGLSDAsMDVDIDG	0.6355
32172	0.549	0.0154	DNA PK (DNA_PK)	DNA damage kinase group (DNA_dam_kin)	S584	SRGLSDAsMDVDIDG	0.6355
32264	0.601	0.044	Protein Kinase A (PKA_Kin)	Basophilic serine/threonine kinase (Baso_ST_kin)	S436	DVFGKSEsLREQILT	1.9938
32264	0.604	0.0425	14-3-3 Mode 1 (1433_m1)	Phosphoserine/threonine binding group (pST_bind)	S436	DVFGKSEsLREQILT	1.9938
32360	0.457	0.022	Casein Kinase 1 (Casn_Kin1)	Acidophilic serine/threonine kinase group (Acid_ST_kin)	S261	NTSTSSSsPAGGVVV	0.8526
32360	0.445	0.00959	CDK1 motif 1-[ST]Px[KR]x (CDK1_1)	Proline-dependent serine/threonine kinase group (Pro_ST_kin)	S261	NTSTSSSsPAGGVVV	0.8526
32360	0.413	0.00655	CDK1 motif 2-[ST]PxxK (CDK1_2)	Proline-dependent serine/threonine kinase group (Pro_ST_kin)	S261	NTSTSSSsPAGGVVV	0.8526
32360	0.666	0.04848	Cdc2 Kinase (Cdc2_Kin)	Proline-dependent serine/threonine kinase group (Pro_ST_kin)	S261	NTSTSSSsPAGGVVV	0.8526
32360	0.633	0.04719	Cdk5 Kinase (Cdk5_Kin)	Proline-dependent serine/threonine kinase group (Pro_ST_kin)	S261	NTSTSSSsPAGGVVV	0.8526
32360	0.628	0.03604	Erk1 Kinase (Erk1_Kin)	Proline-dependent serine/threonine kinase group (Pro_ST_kin)	S261	NTSTSSSsPAGGVVV	0.8526
32392	0.5	0.01239	Casein Kinase 2 (Casn_Kin2)	Acidophilic serine/threonine kinase group (Acid_ST_kin)	S340	QKRGGDEsESSDLPG	2.7625
32392	0.762	0.02022	Clk2 Kinase (Clk2_Kin)	Basophilic serine/threonine kinase (Baso_ST_kin)	S340	QKRGGDEsESSDLPG	2.7625
32392	0.545	0.02443	Casein Kinase 2 (Casn_Kin2)	Acidophilic serine/threonine kinase group (Acid_ST_kin)	S342	RGGDESEsSDLPGPV	1.3155
32392	0.5	0.04593	Casein Kinase 1 (Casn_Kin1)	Acidophilic serine/threonine kinase group (Acid_ST_kin)	S343	GGDESESsDLPGPVQ	1.5178
32392	0.577	0.04003	Casein Kinase 2 (Casn_Kin2)	Acidophilic serine/threonine kinase group (Acid_ST_kin)	S343	GGDESESsDLPGPVQ	1.5178
32686	0.711	0.03882	Aurora B (AuroB)	Basophilic serine/threonine kinase (Baso_ST_kin)	S95	KQSYYKLsRRYHPDG	3.0445
32950	0.581	0.02553	GSK3 Kinase (GSK3_Kin)	Acidophilic serine/threonine kinase group (Acid_ST_kin)	S95	NRSPAPRsRSTSPIP	3.5233
32950	0.457	0.00774	GSK3-improved (GSK3b)	Acidophilic serine/threonine kinase group (Acid_ST_kin)	S95	NRSPAPRsRSTSPIP	3.5233
32970	0.557	0.03189	GSK3-improved (GSK3b)	Acidophilic serine/threonine kinase group (Acid_ST_kin)	S1670	SSPTQNLsRMASSSD	0.8282
33001	0.599	0.01286	Akt Kinase (Akt_Kin)	Basophilic serine/threonine kinase (Baso_ST_kin)	S123	RGTDRSSsGGSVGLI	0.7238
33001	0.698	0.0459	Aurora A (AuroA)	Basophilic serine/threonine kinase (Baso_ST_kin)	S123	RGTDRSSsGGSVGLI	0.7238
33001	0.679	0.02888	Aurora B (AuroB)	Basophilic serine/threonine kinase (Baso_ST_kin)	S123	RGTDRSSsGGSVGLI	0.7238
33001	0.771	0.02211	Clk2 Kinase (Clk2_Kin)	Basophilic serine/threonine kinase (Baso_ST_kin)	S123	RGTDRSSsGGSVGLI	0.7238
33001	0.478	0.01248	14-3-3 Mode 1 (1433_m1)	Phosphoserine/threonine binding group (pST_bind)	S123	RGTDRSSsGGSVGLI	0.7238
33001	0.356	0.00199	Casein Kinase 1 (Casn_Kin1)	Acidophilic serine/threonine kinase group (Acid_ST_kin)	S126	DRSSSGGsVGLIQLE	0.1822
33038	0.624	0.04937	GSK3 Kinase (GSK3_Kin)	Acidophilic serine/threonine kinase group (Acid_ST_kin)	S1976	DNSKSRDsPAISRSY	1.0999
33038	0.552	0.02992	GSK3-improved (GSK3b)	Acidophilic serine/threonine kinase group (Acid_ST_kin)	S1976	DNSKSRDsPAISRSY	1.0999
33038	0.562	0.02749	CDK1 motif 1-[ST]Px[KR]x (CDK1_1)	Proline-dependent serine/threonine kinase group (Pro_ST_kin)	S1976	DNSKSRDsPAISRSY	1.0999
33038	0.537	0.02647	CDK1 motif 2-[ST]PxxK (CDK1_2)	Proline-dependent serine/threonine kinase group (Pro_ST_kin)	S1976	DNSKSRDsPAISRSY	1.0999
33038	0.603	0.02689	Cdc2 Kinase (Cdc2_Kin)	Proline-dependent serine/threonine kinase group (Pro_ST_kin)	S1976	DNSKSRDsPAISRSY	1.0999
33038	0.55	0.0217	Cdk5 Kinase (Cdk5_Kin)	Proline-dependent serine/threonine kinase group (Pro_ST_kin)	S1976	DNSKSRDsPAISRSY	1.0999
33038	0.827	0.04116	Clk2 Kinase (Clk2_Kin)	Basophilic serine/threonine kinase (Baso_ST_kin)	S1980	SRDSPAIsRSYRELL	0.8944
33049	0.475	0.00223	Akt Kinase (Akt_Kin)	Basophilic serine/threonine kinase (Baso_ST_kin)	S86	TRRPREDsPSTPPEV	2.6562
33049	0.667	0.00706	Clk2 Kinase (Clk2_Kin)	Basophilic serine/threonine kinase (Baso_ST_kin)	S86	TRRPREDsPSTPPEV	2.6562
33049	0.614	0.04653	14-3-3 Mode 1 (1433_m1)	Phosphoserine/threonine binding group (pST_bind)	S86	TRRPREDsPSTPPEV	2.6562
33049	0.475	0.01271	CDK1 motif 1-[ST]Px[KR]x (CDK1_1)	Proline-dependent serine/threonine kinase group (Pro_ST_kin)	S86	TRRPREDsPSTPPEV	2.6562
33049	0.445	0.01011	CDK1 motif 2-[ST]PxxK (CDK1_2)	Proline-dependent serine/threonine kinase group (Pro_ST_kin)	S86	TRRPREDsPSTPPEV	2.6562
33049	0.557	0.01478	Erk1 Kinase (Erk1_Kin)	Proline-dependent serine/threonine kinase group (Pro_ST_kin)	S86	TRRPREDsPSTPPEV	2.6562
33049	0.553	0.01501	Cdc2 Kinase (Cdc2_Kin)	Proline-dependent serine/threonine kinase group (Pro_ST_kin)	T89	PREDSPStPPEVNRV	2.8378
33049	0.543	0.02016	Cdk5 Kinase (Cdk5_Kin)	Proline-dependent serine/threonine kinase group (Pro_ST_kin)	T89	PREDSPStPPEVNRV	2.8378
33049	0.592	0.02384	Erk1 Kinase (Erk1_Kin)	Proline-dependent serine/threonine kinase group (Pro_ST_kin)	T89	PREDSPStPPEVNRV	2.8378
33148	0.623	0.0485	GSK3 Kinase (GSK3_Kin)	Acidophilic serine/threonine kinase group (Acid_ST_kin)	S30	PPPAVERsRSQSVGS	4.7353
33148	0.575	0.03953	GSK3-improved (GSK3b)	Acidophilic serine/threonine kinase group (Acid_ST_kin)	S30	PPPAVERsRSQSVGS	4.7353
33148	0.615	0.01571	Akt Kinase (Akt_Kin)	Basophilic serine/threonine kinase (Baso_ST_kin)	S32	PAVERSRsQSVGSEN	1.3885
33148	0.601	0.03827	ATM Kinase (ATM_Kin)	DNA damage kinase group (DNA_dam_kin)	S32	PAVERSRsQSVGSEN	1.3885
33148	0.628	0.04866	DNA PK (DNA_PK)	DNA damage kinase group (DNA_dam_kin)	S32	PAVERSRsQSVGSEN	1.3885
33148	0.351	0.00283	14-3-3 Mode 1 (1433_m1)	Phosphoserine/threonine binding group (pST_bind)	S32	PAVERSRsQSVGSEN	1.3885
33148	0.392	0.00053	Akt Kinase (Akt_Kin)	Basophilic serine/threonine kinase (Baso_ST_kin)	S34	VERSRSQsVGSENGP	0.7016
33148	0.632	0.02379	Aurora A (AuroA)	Basophilic serine/threonine kinase (Baso_ST_kin)	S34	VERSRSQsVGSENGP	0.7016
33148	0.698	0.03489	Aurora B (AuroB)	Basophilic serine/threonine kinase (Baso_ST_kin)	S34	VERSRSQsVGSENGP	0.7016
33148	0.55	0.02349	Calmodulin dependent Kinase 2 (Cam_Kin2)	Basophilic serine/threonine kinase (Baso_ST_kin)	S34	VERSRSQsVGSENGP	0.7016
33148	0.711	0.01149	Clk2 Kinase (Clk2_Kin)	Basophilic serine/threonine kinase (Baso_ST_kin)	S34	VERSRSQsVGSENGP	0.7016
33148	0.544	0.0222	Protein Kinase A (PKA_Kin)	Basophilic serine/threonine kinase (Baso_ST_kin)	S34	VERSRSQsVGSENGP	0.7016
33148	0.357	0.00304	14-3-3 Mode 1 (1433_m1)	Phosphoserine/threonine binding group (pST_bind)	S34	VERSRSQsVGSENGP	0.7016
33174	0.674	0.03076	Akt Kinase (Akt_Kin)	Basophilic serine/threonine kinase (Baso_ST_kin)	T341	SIRDAEFtDSLSTRK	0.9154
33250	0.614	0.02162	Grb2 SH2 (Grb2_SH2)	Src homology 2 group (SH2)	Y21	IYMGKDKyENEDLIK	6.0066
33341	0.365	0.0135	PLK1 Kinase (PLK1)	Acidophilic serine/threonine kinase group (Acid_ST_kin)	S236	DRSVGERsIGSIGQV	0.9684
33358	0.689	0.02645	AMP_Kinase (AMPK)	Basophilic serine/threonine kinase (Baso_ST_kin)	S226	ESYNHHRsFANQSSA	1.1957
33400	0.37	0.00161	Casein Kinase 2 (Casn_Kin2)	Acidophilic serine/threonine kinase group (Acid_ST_kin)	S123	RKKYAFDsDDDDDDE	2.0683
33400	0.778	0.02404	Clk2 Kinase (Clk2_Kin)	Basophilic serine/threonine kinase (Baso_ST_kin)	S123	RKKYAFDsDDDDDDE	2.0683
33400	0.566	0.02029	DNA PK (DNA_PK)	DNA damage kinase group (DNA_dam_kin)	S123	RKKYAFDsDDDDDDE	2.0683
33701	0.619	0.04502	GSK3 Kinase (GSK3_Kin)	Acidophilic serine/threonine kinase group (Acid_ST_kin)	T1470	HSASLPNtRSSSSLQ	3.0041
33701	0.552	0.02992	GSK3-improved (GSK3b)	Acidophilic serine/threonine kinase group (Acid_ST_kin)	T1470	HSASLPNtRSSSSLQ	3.0041
33715	0.592	0.04965	Casein Kinase 2 (Casn_Kin2)	Acidophilic serine/threonine kinase group (Acid_ST_kin)	S600	EFKAFEGsNSDVQGD	1.9671
33716	0.577	0.00436	AMP_Kinase (AMPK)	Basophilic serine/threonine kinase (Baso_ST_kin)	S523	SGLKRSLsQDSSGSL	1.3155
33716	0.609	0.01466	Akt Kinase (Akt_Kin)	Basophilic serine/threonine kinase (Baso_ST_kin)	S523	SGLKRSLsQDSSGSL	1.3155
33716	0.73	0.04479	Aurora B (AuroB)	Basophilic serine/threonine kinase (Baso_ST_kin)	S523	SGLKRSLsQDSSGSL	1.3155
33716	0.42	0.00178	Calmodulin dependent Kinase 2 (Cam_Kin2)	Basophilic serine/threonine kinase (Baso_ST_kin)	S523	SGLKRSLsQDSSGSL	1.3155
33716	0.829	0.04209	Clk2 Kinase (Clk2_Kin)	Basophilic serine/threonine kinase (Baso_ST_kin)	S523	SGLKRSLsQDSSGSL	1.3155
33716	0.379	0.00062	ATM Kinase (ATM_Kin)	DNA damage kinase group (DNA_dam_kin)	S523	SGLKRSLsQDSSGSL	1.3155
33716	0.539	0.01341	DNA PK (DNA_PK)	DNA damage kinase group (DNA_dam_kin)	S523	SGLKRSLsQDSSGSL	1.3155
33716	0.562	0.02873	14-3-3 Mode 1 (1433_m1)	Phosphoserine/threonine binding group (pST_bind)	S523	SGLKRSLsQDSSGSL	1.3155
33716	0.591	0.03921	Protein Kinase A (PKA_Kin)	Basophilic serine/threonine kinase (Baso_ST_kin)	S521	SSSGLKRsLSQDSSG	2.3024
33884	0.589	0.02949	GSK3 Kinase (GSK3_Kin)	Acidophilic serine/threonine kinase group (Acid_ST_kin)	T799	KETSRWMtRAVTPSN	0.5054
33884	0.497	0.01472	GSK3-improved (GSK3b)	Acidophilic serine/threonine kinase group (Acid_ST_kin)	T799	KETSRWMtRAVTPSN	0.5054
33906	0.599	0.00646	AMP_Kinase (AMPK)	Basophilic serine/threonine kinase (Baso_ST_kin)	S49	YPIRRKIsQLEQSFR	1.0649
33906	0.69	0.0323	Aurora B (AuroB)	Basophilic serine/threonine kinase (Baso_ST_kin)	S49	YPIRRKIsQLEQSFR	1.0649
33906	0.514	0.01558	Protein Kinase A (PKA_Kin)	Basophilic serine/threonine kinase (Baso_ST_kin)	S49	YPIRRKIsQLEQSFR	1.0649
33952	0.668	0.01969	AMP_Kinase (AMPK)	Basophilic serine/threonine kinase (Baso_ST_kin)	T92	DPLVASLtRSDSAPD	1.6022
33971	0.497	0.04406	Casein Kinase 1 (Casn_Kin1)	Acidophilic serine/threonine kinase group (Acid_ST_kin)	T729	IDGSSDLtQLFTRSG	0.5633
33971	0.508	0.04615	PLK1 Kinase (PLK1)	Acidophilic serine/threonine kinase group (Acid_ST_kin)	T729	IDGSSDLtQLFTRSG	0.5633
34048	0.698	0.04603	Aurora A (AuroA)	Basophilic serine/threonine kinase (Baso_ST_kin)	S24	GSGVVRSsSSAGDLG	1.4625
34048	0.745	0.04953	Aurora B (AuroB)	Basophilic serine/threonine kinase (Baso_ST_kin)	S24	GSGVVRSsSSAGDLG	1.4625
34048	0.575	0.03024	CDK1 motif 1-[ST]Px[KR]x (CDK1_1)	Proline-dependent serine/threonine kinase group (Pro_ST_kin)	S33	SAGDLGSsPVVRATE	0.3469
34048	0.551	0.02943	CDK1 motif 2-[ST]PxxK (CDK1_2)	Proline-dependent serine/threonine kinase group (Pro_ST_kin)	S33	SAGDLGSsPVVRATE	0.3469
34048	0.601	0.02646	Cdc2 Kinase (Cdc2_Kin)	Proline-dependent serine/threonine kinase group (Pro_ST_kin)	S33	SAGDLGSsPVVRATE	0.3469
34048	0.561	0.02438	Cdk5 Kinase (Cdk5_Kin)	Proline-dependent serine/threonine kinase group (Pro_ST_kin)	S33	SAGDLGSsPVVRATE	0.3469
34074	0.68	0.0385	Aurora A (AuroA)	Basophilic serine/threonine kinase (Baso_ST_kin)	S385	PLSPKKRsSLLSTNQ	1.0964
34074	0.659	0.02302	Aurora B (AuroB)	Basophilic serine/threonine kinase (Baso_ST_kin)	S385	PLSPKKRsSLLSTNQ	1.0964
34074	0.528	0.01819	Protein Kinase A (PKA_Kin)	Basophilic serine/threonine kinase (Baso_ST_kin)	S385	PLSPKKRsSLLSTNQ	1.0964
34258	0.618	0.01617	Akt Kinase (Akt_Kin)	Basophilic serine/threonine kinase (Baso_ST_kin)	S36	RNPRRLHsAQSSGME	0.808
34258	0.718	0.01238	Clk2 Kinase (Clk2_Kin)	Basophilic serine/threonine kinase (Baso_ST_kin)	S36	RNPRRLHsAQSSGME	0.808
34258	0.565	0.02966	14-3-3 Mode 1 (1433_m1)	Phosphoserine/threonine binding group (pST_bind)	S36	RNPRRLHsAQSSGME	0.808
34258	0.485	0.04003	PLK1 Kinase (PLK1)	Acidophilic serine/threonine kinase group (Acid_ST_kin)	S45	QSSGMESsVLRFNLN	0.8545
34258	0.506	0.04379	PKC epsilon (PKC_epsilon)	Basophilic serine/threonine kinase (Baso_ST_kin)	S45	QSSGMESsVLRFNLN	0.8545
34258	0.49	0.02093	PKC alpha/beta/gamma (PKC_common)	Basophilic serine/threonine kinase (Baso_ST_kin)	S321	EKRPGAGsSHHKKGF	0.7618
34258	0.544	0.03109	PKC zeta (PKC_zeta)	Basophilic serine/threonine kinase (Baso_ST_kin)	S321	EKRPGAGsSHHKKGF	0.7618
34338	0.491	0.02109	PKC alpha/beta/gamma (PKC_common)	Basophilic serine/threonine kinase (Baso_ST_kin)	S380	KRCHFFKsFFITKLL	0.2795
34338	0.469	0.00659	PKC zeta (PKC_zeta)	Basophilic serine/threonine kinase (Baso_ST_kin)	S380	KRCHFFKsFFITKLL	0.2795
34699	0.653	0.02445	Akt Kinase (Akt_Kin)	Basophilic serine/threonine kinase (Baso_ST_kin)	S96	GRHFRRPsAPLLADF	1.1982
34699	0.569	0.01212	Aurora A (AuroA)	Basophilic serine/threonine kinase (Baso_ST_kin)	S96	GRHFRRPsAPLLADF	1.1982
34699	0.497	0.00422	Aurora B (AuroB)	Basophilic serine/threonine kinase (Baso_ST_kin)	S96	GRHFRRPsAPLLADF	1.1982
34699	0.837	0.04609	Clk2 Kinase (Clk2_Kin)	Basophilic serine/threonine kinase (Baso_ST_kin)	S96	GRHFRRPsAPLLADF	1.1982
34699	0.391	0.00446	Protein Kinase A (PKA_Kin)	Basophilic serine/threonine kinase (Baso_ST_kin)	S96	GRHFRRPsAPLLADF	1.1982
34699	0.326	0.00198	14-3-3 Mode 1 (1433_m1)	Phosphoserine/threonine binding group (pST_bind)	S96	GRHFRRPsAPLLADF	1.1982
34699	0.316	0.00314	CDK1 motif 1-[ST]Px[KR]x (CDK1_1)	Proline-dependent serine/threonine kinase group (Pro_ST_kin)	S113	ASLLESSsPRRLNLH	3.2716
34699	0.466	0.01316	CDK1 motif 2-[ST]PxxK (CDK1_2)	Proline-dependent serine/threonine kinase group (Pro_ST_kin)	S113	ASLLESSsPRRLNLH	3.2716
34699	0.49	0.0063	Cdc2 Kinase (Cdc2_Kin)	Proline-dependent serine/threonine kinase group (Pro_ST_kin)	S113	ASLLESSsPRRLNLH	3.2716
34699	0.439	0.0054	Cdk5 Kinase (Cdk5_Kin)	Proline-dependent serine/threonine kinase group (Pro_ST_kin)	S113	ASLLESSsPRRLNLH	3.2716
34793	0.823	0.03974	Clk2 Kinase (Clk2_Kin)	Basophilic serine/threonine kinase (Baso_ST_kin)	S902	DSTHAQRsRSRSIED	5.3554
34857	0.509	0.03532	PKC mu (PKC_mu)	Basophilic serine/threonine kinase (Baso_ST_kin)	T594	HSVAYKKtMEQNVAE	3.926
34879	0.617	0.01598	Akt Kinase (Akt_Kin)	Basophilic serine/threonine kinase (Baso_ST_kin)	S67	GVRSEYGsLGDLPSP	0.649
34907	0.592	0.03803	14-3-3 Mode 1 (1433_m1)	Phosphoserine/threonine binding group (pST_bind)	T158	GIVTGSDtRPDRGLS	3.7435
34991	0.548	0.02564	Casein Kinase 2 (Casn_Kin2)	Acidophilic serine/threonine kinase group (Acid_ST_kin)	T263	KSTDDDNtEQLLRDL	2.2814
35149	0.408	0.00293	Casein Kinase 2 (Casn_Kin2)	Acidophilic serine/threonine kinase group (Acid_ST_kin)	S614	PIRIDDGsDEEGSVE	2.5421
35227	0.704	0.04241	Akt Kinase (Akt_Kin)	Basophilic serine/threonine kinase (Baso_ST_kin)	S121	QKRNLGTsVQQIDRL	0.9764
35381	0.687	0.04119	Aurora A (AuroA)	Basophilic serine/threonine kinase (Baso_ST_kin)	S99	FDDPFRSsVHMDGGH	0.8057
35381	0.538	0.0071	Aurora B (AuroB)	Basophilic serine/threonine kinase (Baso_ST_kin)	S99	FDDPFRSsVHMDGGH	0.8057
35409	0.69	0.03237	Aurora B (AuroB)	Basophilic serine/threonine kinase (Baso_ST_kin)	S1234	KQSTKKTsDAPKKRK	2.3123
35409	0.589	0.03843	Protein Kinase A (PKA_Kin)	Basophilic serine/threonine kinase (Baso_ST_kin)	S1234	KQSTKKTsDAPKKRK	2.3123
35473	0.581	0.04239	GSK3-improved (GSK3b)	Acidophilic serine/threonine kinase group (Acid_ST_kin)	T283	LKVSASAtAASSQKG	0.6124
35818	0.727	0.04495	AMP_Kinase (AMPK)	Basophilic serine/threonine kinase (Baso_ST_kin)	S72	PCHRVVQsDLSLGGF	0.7286
35818	0.428	0.02669	PLK1 Kinase (PLK1)	Acidophilic serine/threonine kinase group (Acid_ST_kin)	S75	RVVQSDLsLGGFGGT	0.3416
35818	0.707	0.04996	Aurora A (AuroA)	Basophilic serine/threonine kinase (Baso_ST_kin)	S75	RVVQSDLsLGGFGGT	0.3416
35818	0.518	0.04088	PKC mu (PKC_mu)	Basophilic serine/threonine kinase (Baso_ST_kin)	S75	RVVQSDLsLGGFGGT	0.3416
36072	0.723	0.04235	AMP_Kinase (AMPK)	Basophilic serine/threonine kinase (Baso_ST_kin)	S93	SPPPSPTsSRMFPFS	1.7802
36072	0.589	0.02949	GSK3 Kinase (GSK3_Kin)	Acidophilic serine/threonine kinase group (Acid_ST_kin)	S94	PPPSPTSsRMFPFSD	0.9969
36097	0.733	0.04825	AMP_Kinase (AMPK)	Basophilic serine/threonine kinase (Baso_ST_kin)	S143	WKWNASGsFGSLLMQ	0.4677
36097	0.503	0.04767	Casein Kinase 1 (Casn_Kin1)	Acidophilic serine/threonine kinase group (Acid_ST_kin)	S146	NASGSFGsLLMQLQK	0.1771
36158	0.677	0.03743	Aurora A (AuroA)	Basophilic serine/threonine kinase (Baso_ST_kin)	S96	KSWWGRRsGAGVVRG	1.1656
36158	0.594	0.01192	Aurora B (AuroB)	Basophilic serine/threonine kinase (Baso_ST_kin)	S96	KSWWGRRsGAGVVRG	1.1656
36351	0.516	0.04834	PLK1 Kinase (PLK1)	Acidophilic serine/threonine kinase group (Acid_ST_kin)	S524	SAHSRDAsTSIRSTK	0.7024
36351	0.683	0.0342	Akt Kinase (Akt_Kin)	Basophilic serine/threonine kinase (Baso_ST_kin)	S524	SAHSRDAsTSIRSTK	0.7024
36351	0.678	0.00798	Clk2 Kinase (Clk2_Kin)	Basophilic serine/threonine kinase (Baso_ST_kin)	S524	SAHSRDAsTSIRSTK	0.7024
36351	0.523	0.0197	14-3-3 Mode 1 (1433_m1)	Phosphoserine/threonine binding group (pST_bind)	S524	SAHSRDAsTSIRSTK	0.7024
36351	0.438	0.00738	PKC alpha/beta/gamma (PKC_common)	Basophilic serine/threonine kinase (Baso_ST_kin)	S526	HSRDASTsIRSTKER	1.0928
36351	0.492	0.04038	Casein Kinase 1 (Casn_Kin1)	Acidophilic serine/threonine kinase group (Acid_ST_kin)	T525	AHSRDAStSIRSTKE	0.8238
36351	0.57	0.0375	GSK3-improved (GSK3b)	Acidophilic serine/threonine kinase group (Acid_ST_kin)	T525	AHSRDAStSIRSTKE	0.8238
36352	0.451	0.00153	Akt Kinase (Akt_Kin)	Basophilic serine/threonine kinase (Baso_ST_kin)	T360	KPRARLRtASSSDVT	0.9692
36352	0.394	0.00479	14-3-3 Mode 1 (1433_m1)	Phosphoserine/threonine binding group (pST_bind)	T360	KPRARLRtASSSDVT	0.9692
36463	0.459	0.02292	Casein Kinase 1 (Casn_Kin1)	Acidophilic serine/threonine kinase group (Acid_ST_kin)	S1895	EDDRDISsVPSTGQD	0.4437
36467	0.727	0.01368	Clk2 Kinase (Clk2_Kin)	Basophilic serine/threonine kinase (Baso_ST_kin)	S538	RTVNRFAsDNSLSIA	1.004
36467	0.57	0.03093	14-3-3 Mode 1 (1433_m1)	Phosphoserine/threonine binding group (pST_bind)	S538	RTVNRFAsDNSLSIA	1.004
36467	0.616	0.04818	ATM Kinase (ATM_Kin)	DNA damage kinase group (DNA_dam_kin)	S543	FASDNSLsIAELRGR	0.4162
36467	0.262	0.00189	PLK1 Kinase (PLK1)	Acidophilic serine/threonine kinase group (Acid_ST_kin)	S541	NRFASDNsLSIAELR	0.6635
36467	0.511	0.00596	Aurora A (AuroA)	Basophilic serine/threonine kinase (Baso_ST_kin)	S404	GEEPRRGsMTMSDLI	0.8413
36467	0.51	0.0038	Akt Kinase (Akt_Kin)	Basophilic serine/threonine kinase (Baso_ST_kin)	S404	GEEPRRGsMTMSDLI	0.8413
36467	0.534	0.01799	Calmodulin dependent Kinase 2 (Cam_Kin2)	Basophilic serine/threonine kinase (Baso_ST_kin)	S404	GEEPRRGsMTMSDLI	0.8413
36467	0.303	0.00125	Protein Kinase A (PKA_Kin)	Basophilic serine/threonine kinase (Baso_ST_kin)	S404	GEEPRRGsMTMSDLI	0.8413
36467	0.505	0.01654	14-3-3 Mode 1 (1433_m1)	Phosphoserine/threonine binding group (pST_bind)	S404	GEEPRRGsMTMSDLI	0.8413
36467	0.583	0.01086	Aurora B (AuroB)	Basophilic serine/threonine kinase (Baso_ST_kin)	S404	GEEPRRGsMTMSDLI	0.8413
36467	0.525	0.0016	AMP_Kinase (AMPK)	Basophilic serine/threonine kinase (Baso_ST_kin)	T406	EPRRGSMtMSDLIRM	0.9714
36467	0.635	0.01994	Akt Kinase (Akt_Kin)	Basophilic serine/threonine kinase (Baso_ST_kin)	T406	EPRRGSMtMSDLIRM	0.9714
36467	0.464	0.01746	PKC epsilon (PKC_epsilon)	Basophilic serine/threonine kinase (Baso_ST_kin)	T406	EPRRGSMtMSDLIRM	0.9714
36468	0.767	0.02135	Clk2 Kinase (Clk2_Kin)	Basophilic serine/threonine kinase (Baso_ST_kin)	S231	KVDARDAsRAAVSEA	1.0357
36501	0.69	0.04254	Aurora A (AuroA)	Basophilic serine/threonine kinase (Baso_ST_kin)	S274	DENGSRSsTEFAEAE	1.7446
36501	0.554	0.02833	Casein Kinase 2 (Casn_Kin2)	Acidophilic serine/threonine kinase group (Acid_ST_kin)	T275	ENGSRSStEFAEAEK	0.8998
36501	0.709	0.04472	Akt Kinase (Akt_Kin)	Basophilic serine/threonine kinase (Baso_ST_kin)	T275	ENGSRSStEFAEAEK	0.8998
36501	0.333	0.00219	14-3-3 Mode 1 (1433_m1)	Phosphoserine/threonine binding group (pST_bind)	T275	ENGSRSStEFAEAEK	0.8998
36552	0.609	0.03718	CDK1 motif 1-[ST]Px[KR]x (CDK1_1)	Proline-dependent serine/threonine kinase group (Pro_ST_kin)	S885	NSCLSERsPVLEAGS	0.9859
36552	0.587	0.03678	CDK1 motif 2-[ST]PxxK (CDK1_2)	Proline-dependent serine/threonine kinase group (Pro_ST_kin)	S885	NSCLSERsPVLEAGS	0.9859
36694	0.505	0.01331	Casein Kinase 2 (Casn_Kin2)	Acidophilic serine/threonine kinase group (Acid_ST_kin)	T70	PTKALLPtDEEDAAS	2.1124
36694	0.345	0.01013	PLK1 Kinase (PLK1)	Acidophilic serine/threonine kinase group (Acid_ST_kin)	S87	NVDIDDQsIASTAEQ	0.8429
36694	0.61	0.04003	GSK3 Kinase (GSK3_Kin)	Acidophilic serine/threonine kinase group (Acid_ST_kin)	T91	DDQSIAStAEQTRAT	1.3567
36694	0.509	0.0173	GSK3-improved (GSK3b)	Acidophilic serine/threonine kinase group (Acid_ST_kin)	T91	DDQSIAStAEQTRAT	1.3567
36704	0.479	0.03871	PLK1 Kinase (PLK1)	Acidophilic serine/threonine kinase group (Acid_ST_kin)	S669	RRVMRENsLITSSIS	0.741
36704	0.663	0.02751	Akt Kinase (Akt_Kin)	Basophilic serine/threonine kinase (Baso_ST_kin)	S669	RRVMRENsLITSSIS	0.741
36704	0.711	0.01144	Clk2 Kinase (Clk2_Kin)	Basophilic serine/threonine kinase (Baso_ST_kin)	S669	RRVMRENsLITSSIS	0.741
36704	0.526	0.04574	PKC mu (PKC_mu)	Basophilic serine/threonine kinase (Baso_ST_kin)	S669	RRVMRENsLITSSIS	0.741
36704	0.552	0.02462	Protein Kinase A (PKA_Kin)	Basophilic serine/threonine kinase (Baso_ST_kin)	S669	RRVMRENsLITSSIS	0.741
36704	0.46	0.01584	PKC epsilon (PKC_epsilon)	Basophilic serine/threonine kinase (Baso_ST_kin)	S674	ENSLITSsISSVDSR	0.7477
36704	0.477	0.03106	Casein Kinase 1 (Casn_Kin1)	Acidophilic serine/threonine kinase group (Acid_ST_kin)	S677	LITSSISsVDSRFTD	0.4792
36704	0.579	0.02501	DNA PK (DNA_PK)	DNA damage kinase group (DNA_dam_kin)	S677	LITSSISsVDSRFTD	0.4792
36756	0.638	0.01229	AMP_Kinase (AMPK)	Basophilic serine/threonine kinase (Baso_ST_kin)	S63	GHIQRTFsSDDAEGF	1.4344
36756	0.614	0.01552	Akt Kinase (Akt_Kin)	Basophilic serine/threonine kinase (Baso_ST_kin)	S63	GHIQRTFsSDDAEGF	1.4344
36756	0.782	0.02509	Clk2 Kinase (Clk2_Kin)	Basophilic serine/threonine kinase (Baso_ST_kin)	S63	GHIQRTFsSDDAEGF	1.4344
36756	0.6	0.04345	Protein Kinase A (PKA_Kin)	Basophilic serine/threonine kinase (Baso_ST_kin)	S63	GHIQRTFsSDDAEGF	1.4344
36756	0.521	0.01703	Casein Kinase 2 (Casn_Kin2)	Acidophilic serine/threonine kinase group (Acid_ST_kin)	S64	HIQRTFSsDDAEGFD	1.004
36966	0.517	0.00917	Cdc2 Kinase (Cdc2_Kin)	Proline-dependent serine/threonine kinase group (Pro_ST_kin)	S99	GESPPNDsPFERKSE	1.986
36966	0.488	0.0104	Cdk5 Kinase (Cdk5_Kin)	Proline-dependent serine/threonine kinase group (Pro_ST_kin)	S99	GESPPNDsPFERKSE	1.986
36966	0.641	0.04177	Erk1 Kinase (Erk1_Kin)	Proline-dependent serine/threonine kinase group (Pro_ST_kin)	S99	GESPPNDsPFERKSE	1.986
37231	0.506	0.04178	Src SH2 (Src_SH2)	Src homology 2 group (SH2)	Y605	AVNSFRMyKELTYPK	1.9879
37231	0.573	0.03463	Calmodulin dependent Kinase 2 (Cam_Kin2)	Basophilic serine/threonine kinase (Baso_ST_kin)	T609	FRMYKELtYPKGGGE	2.2887
37231	0.442	0.0161	PKC delta PKC_delta)	Basophilic serine/threonine kinase (Baso_ST_kin)	T609	FRMYKELtYPKGGGE	2.2887
37231	0.63	0.01187	PDK1 Binding (PDK1_Bind)	Kinase binding site group (Kin_bind)	T609	FRMYKELtYPKGGGE	2.2887
37231	0.566	0.02995	14-3-3 Mode 1 (1433_m1)	Phosphoserine/threonine binding group (pST_bind)	T609	FRMYKELtYPKGGGE	2.2887
37280	0.472	0.02908	Casein Kinase 1 (Casn_Kin1)	Acidophilic serine/threonine kinase group (Acid_ST_kin)	T30	HETWTSGtAKLRKTV	0.7308
37296	0.606	0.00741	AMP_Kinase (AMPK)	Basophilic serine/threonine kinase (Baso_ST_kin)	S600	PRKASSDsFLALLES	0.4958
37348	0.559	0.00316	AMP_Kinase (AMPK)	Basophilic serine/threonine kinase (Baso_ST_kin)	S616	ASHRRSRsSGTLEDI	1.5428
37348	0.653	0.02445	Akt Kinase (Akt_Kin)	Basophilic serine/threonine kinase (Baso_ST_kin)	S616	ASHRRSRsSGTLEDI	1.5428
37348	0.665	0.03328	Aurora A (AuroA)	Basophilic serine/threonine kinase (Baso_ST_kin)	S616	ASHRRSRsSGTLEDI	1.5428
37348	0.652	0.02147	Aurora B (AuroB)	Basophilic serine/threonine kinase (Baso_ST_kin)	S616	ASHRRSRsSGTLEDI	1.5428
37348	0.516	0.00171	Clk2 Kinase (Clk2_Kin)	Basophilic serine/threonine kinase (Baso_ST_kin)	S616	ASHRRSRsSGTLEDI	1.5428
37348	0.572	0.03143	Protein Kinase A (PKA_Kin)	Basophilic serine/threonine kinase (Baso_ST_kin)	S616	ASHRRSRsSGTLEDI	1.5428
37348	0.307	0.00144	14-3-3 Mode 1 (1433_m1)	Phosphoserine/threonine binding group (pST_bind)	S616	ASHRRSRsSGTLEDI	1.5428
37348	0.696	0.02938	AMP_Kinase (AMPK)	Basophilic serine/threonine kinase (Baso_ST_kin)	S617	SHRRSRSsGTLEDIA	0.9494
37348	0.689	0.03636	Akt Kinase (Akt_Kin)	Basophilic serine/threonine kinase (Baso_ST_kin)	S617	SHRRSRSsGTLEDIA	0.9494
37348	0.63	0.01666	Aurora B (AuroB)	Basophilic serine/threonine kinase (Baso_ST_kin)	S617	SHRRSRSsGTLEDIA	0.9494
37348	0.833	0.04414	Clk2 Kinase (Clk2_Kin)	Basophilic serine/threonine kinase (Baso_ST_kin)	S617	SHRRSRSsGTLEDIA	0.9494
37348	0.696	0.04508	Aurora A (AuroA)	Basophilic serine/threonine kinase (Baso_ST_kin)	S614	LLASHRRsRSSGTLE	4.144
37348	0.821	0.03859	Clk2 Kinase (Clk2_Kin)	Basophilic serine/threonine kinase (Baso_ST_kin)	S614	LLASHRRsRSSGTLE	4.144
37348	0.551	0.02443	Protein Kinase A (PKA_Kin)	Basophilic serine/threonine kinase (Baso_ST_kin)	S614	LLASHRRsRSSGTLE	4.144
37348	0.486	0.03636	Casein Kinase 1 (Casn_Kin1)	Acidophilic serine/threonine kinase group (Acid_ST_kin)	T619	RRSRSSGtLEDIAQQ	1.0461
37348	0.478	0.01606	PKC alpha/beta/gamma (PKC_common)	Basophilic serine/threonine kinase (Baso_ST_kin)	T619	RRSRSSGtLEDIAQQ	1.0461
37348	0.491	0.00633	DNA PK (DNA_PK)	DNA damage kinase group (DNA_dam_kin)	T619	RRSRSSGtLEDIAQQ	1.0461
37617	0.373	0.00251	Itk Kinase (Itk_Kin)	Tyrosine kinase group (Y_kin)	Y360	RRLRLFLyVLRSPIW	0.3074
37682	0.449	0.00993	CDK1 motif 1-[ST]Px[KR]x (CDK1_1)	Proline-dependent serine/threonine kinase group (Pro_ST_kin)	S166	PRAPAVRsPSTLSQE	1.3351
37682	0.417	0.00695	CDK1 motif 2-[ST]PxxK (CDK1_2)	Proline-dependent serine/threonine kinase group (Pro_ST_kin)	S166	PRAPAVRsPSTLSQE	1.3351
37682	0.627	0.03556	Erk1 Kinase (Erk1_Kin)	Proline-dependent serine/threonine kinase group (Pro_ST_kin)	S166	PRAPAVRsPSTLSQE	1.3351
37682	0.731	0.01428	Clk2 Kinase (Clk2_Kin)	Basophilic serine/threonine kinase (Baso_ST_kin)	S188	INASLEEsRRRLGPR	6.9208
37682	0.492	0.00636	ATM Kinase (ATM_Kin)	DNA damage kinase group (DNA_dam_kin)	S171	VRSPSTLsQEDAELQ	1.8307
37682	0.409	0.0015	DNA PK (DNA_PK)	DNA damage kinase group (DNA_dam_kin)	S171	VRSPSTLsQEDAELQ	1.8307
37682	0.467	0.03571	PLK1 Kinase (PLK1)	Acidophilic serine/threonine kinase group (Acid_ST_kin)	S184	LQAAINAsLEESRRR	1.2815
37839	0.618	0.02075	Aurora A (AuroA)	Basophilic serine/threonine kinase (Baso_ST_kin)	S699	ARKEQRLsQLSPLLG	0.9494
37839	0.595	0.01201	Aurora B (AuroB)	Basophilic serine/threonine kinase (Baso_ST_kin)	S699	ARKEQRLsQLSPLLG	0.9494
37839	0.531	0.01265	ATM Kinase (ATM_Kin)	DNA damage kinase group (DNA_dam_kin)	S699	ARKEQRLsQLSPLLG	0.9494
37839	0.626	0.04763	DNA PK (DNA_PK)	DNA damage kinase group (DNA_dam_kin)	S699	ARKEQRLsQLSPLLG	0.9494
37839	0.691	0.0272	AMP_Kinase (AMPK)	Basophilic serine/threonine kinase (Baso_ST_kin)	S710	PLLGSSLsDMKNLDY	1.1218
37928	0.428	0.02665	PLK1 Kinase (PLK1)	Acidophilic serine/threonine kinase group (Acid_ST_kin)	S448	YGGVGDAsVVSSAGG	0.3825
37928	0.583	0.04475	Lck Kinase (Lck_Kin)	Tyrosine kinase group (Y_kin)	Y441	DYDYSKAyGGVGDAS	0.5273
37928	0.589	0.04681	GSK3-improved (GSK3b)	Acidophilic serine/threonine kinase group (Acid_ST_kin)	S452	GDASVVSsAGGTLGE	0.3022
37940	0.462	0.00673	Casein Kinase 2 (Casn_Kin2)	Acidophilic serine/threonine kinase group (Acid_ST_kin)	T599	AKDESPDtSDAEVDA	1.9309
37940	0.496	0.01158	Casein Kinase 2 (Casn_Kin2)	Acidophilic serine/threonine kinase group (Acid_ST_kin)	S596	DVPAKDEsPDTSDAE	3.3101
37940	0.61	0.04003	GSK3 Kinase (GSK3_Kin)	Acidophilic serine/threonine kinase group (Acid_ST_kin)	S596	DVPAKDEsPDTSDAE	3.3101
37940	0.506	0.01663	GSK3-improved (GSK3b)	Acidophilic serine/threonine kinase group (Acid_ST_kin)	S596	DVPAKDEsPDTSDAE	3.3101
37940	0.614	0.03805	CDK1 motif 1-[ST]Px[KR]x (CDK1_1)	Proline-dependent serine/threonine kinase group (Pro_ST_kin)	S596	DVPAKDEsPDTSDAE	3.3101
37940	0.592	0.0377	CDK1 motif 2-[ST]PxxK (CDK1_2)	Proline-dependent serine/threonine kinase group (Pro_ST_kin)	S596	DVPAKDEsPDTSDAE	3.3101
38166	0.575	0.03855	Casein Kinase 2 (Casn_Kin2)	Acidophilic serine/threonine kinase group (Acid_ST_kin)	S9	SGERWGDsTSEDELD	1.7
38166	0.457	0.00632	Casein Kinase 2 (Casn_Kin2)	Acidophilic serine/threonine kinase group (Acid_ST_kin)	S11	ERWGDSTsEDELDLR	2.975
38166	0.779	0.02418	Clk2 Kinase (Clk2_Kin)	Basophilic serine/threonine kinase (Baso_ST_kin)	S11	ERWGDSTsEDELDLR	2.975
38166	0.58	0.02527	DNA PK (DNA_PK)	DNA damage kinase group (DNA_dam_kin)	S11	ERWGDSTsEDELDLR	2.975
38166	0.472	0.00796	Casein Kinase 2 (Casn_Kin2)	Acidophilic serine/threonine kinase group (Acid_ST_kin)	T10	GERWGDStSEDELDL	2.8687
38166	0.516	0.04843	PLK1 Kinase (PLK1)	Acidophilic serine/threonine kinase group (Acid_ST_kin)	T10	GERWGDStSEDELDL	2.8687
38520	0.42	0.00493	PKC alpha/beta/gamma (PKC_common)	Basophilic serine/threonine kinase (Baso_ST_kin)	T46	KRRRMSNtMKDDART	2.4463
38520	0.43	0.01298	PKC delta PKC_delta)	Basophilic serine/threonine kinase (Baso_ST_kin)	T46	KRRRMSNtMKDDART	2.4463
38520	0.447	0.01079	PKC epsilon (PKC_epsilon)	Basophilic serine/threonine kinase (Baso_ST_kin)	T46	KRRRMSNtMKDDART	2.4463
38520	0.582	0.04013	Calmodulin dependent Kinase 2 (Cam_Kin2)	Basophilic serine/threonine kinase (Baso_ST_kin)	S55	KDDARTQsKDGVLSG	2.5369
38610	0.613	0.04641	14-3-3 Mode 1 (1433_m1)	Phosphoserine/threonine binding group (pST_bind)	T43	ENASRAItHRVDCNE	0.4633
38611	0.412	0.00076	Akt Kinase (Akt_Kin)	Basophilic serine/threonine kinase (Baso_ST_kin)	T705	GLRNRARtVSVNSIP	0.4831
38611	0.58	0.03823	Calmodulin dependent Kinase 2 (Cam_Kin2)	Basophilic serine/threonine kinase (Baso_ST_kin)	T705	GLRNRARtVSVNSIP	0.4831
38611	0.512	0.01506	Protein Kinase A (PKA_Kin)	Basophilic serine/threonine kinase (Baso_ST_kin)	T705	GLRNRARtVSVNSIP	0.4831
38611	0.382	0.00412	14-3-3 Mode 1 (1433_m1)	Phosphoserine/threonine binding group (pST_bind)	T705	GLRNRARtVSVNSIP	0.4831
39302	0.459	0.03567	PLCg N-terminal SH2 (PLCg_NSH2)	Src homology 2 group (SH2)	Y185	EDRVTKYyVGLSGNK	0.6816
39302	0.529	0.02932	Shc SH2 (Shc_SH2)	Src homology 2 group (SH2)	Y185	EDRVTKYyVGLSGNK	0.6816
39302	0.493	0.02932	Fgr Kinase (Fgr_Kin)	Tyrosine kinase group (Y_kin)	Y185	EDRVTKYyVGLSGNK	0.6816
39302	0.481	0.0393	PDGFR Kin (PDGFR_Kin)	Tyrosine kinase group (Y_kin)	Y185	EDRVTKYyVGLSGNK	0.6816
39463	0.573	0.00933	Akt Kinase (Akt_Kin)	Basophilic serine/threonine kinase (Baso_ST_kin)	T1553	RCVDRAStIIEETSS	0.381
39463	0.56	0.02729	Protein Kinase A (PKA_Kin)	Basophilic serine/threonine kinase (Baso_ST_kin)	T1553	RCVDRAStIIEETSS	0.381
39463	0.426	0.0118	Casein Kinase 1 (Casn_Kin1)	Acidophilic serine/threonine kinase group (Acid_ST_kin)	S1563	EETSSATsLV*****	0.565
39463	0.646	0.01862	PDZ (nNOS) class 1 (PDZ_nNOS_1)	PDZ domain binding group (PDZ)	S1563	EETSSATsLV*****	0.565
39617	0.717	0.03946	AMP_Kinase (AMPK)	Basophilic serine/threonine kinase (Baso_ST_kin)	S339	LVRKYQKsASSLSDV	1.9297
39617	0.5	0.00929	Calmodulin dependent Kinase 2 (Cam_Kin2)	Basophilic serine/threonine kinase (Baso_ST_kin)	S339	LVRKYQKsASSLSDV	1.9297
39617	0.571	0.03623	Casein Kinase 2 (Casn_Kin2)	Acidophilic serine/threonine kinase group (Acid_ST_kin)	S344	QKSASSLsDVPESGA	0.6505
39617	0.504	0.04874	Casein Kinase 1 (Casn_Kin1)	Acidophilic serine/threonine kinase group (Acid_ST_kin)	S326	RNLEDIGsVSENSLV	0.367
39617	0.396	0.01962	PLK1 Kinase (PLK1)	Acidophilic serine/threonine kinase group (Acid_ST_kin)	S331	IGSVSENsLVRKYQK	1.0648
39625	0.564	0.0279	CDK1 motif 1-[ST]Px[KR]x (CDK1_1)	Proline-dependent serine/threonine kinase group (Pro_ST_kin)	S46	KIRPGNLsPTNSGNA	1.5762
39625	0.539	0.0269	CDK1 motif 2-[ST]PxxK (CDK1_2)	Proline-dependent serine/threonine kinase group (Pro_ST_kin)	S46	KIRPGNLsPTNSGNA	1.5762
39625	0.531	0.01028	Erk1 Kinase (Erk1_Kin)	Proline-dependent serine/threonine kinase group (Pro_ST_kin)	S46	KIRPGNLsPTNSGNA	1.5762
39628	0.438	0.01528	Casein Kinase 1 (Casn_Kin1)	Acidophilic serine/threonine kinase group (Acid_ST_kin)	T122	VDDSTPVtVWRQLTL	0.5802
39779	0.432	0.00646	PKC alpha/beta/gamma (PKC_common)	Basophilic serine/threonine kinase (Baso_ST_kin)	T570	STSTISStPRKRRKR	3.5974
39779	0.175	0.0002	CDK1 motif 1-[ST]Px[KR]x (CDK1_1)	Proline-dependent serine/threonine kinase group (Pro_ST_kin)	T570	STSTISStPRKRRKR	3.5974
39779	0.33	0.00183	CDK1 motif 2-[ST]PxxK (CDK1_2)	Proline-dependent serine/threonine kinase group (Pro_ST_kin)	T570	STSTISStPRKRRKR	3.5974
39779	0.258	6e-05	Cdc2 Kinase (Cdc2_Kin)	Proline-dependent serine/threonine kinase group (Pro_ST_kin)	T570	STSTISStPRKRRKR	3.5974
39779	0.182	4e-05	Cdk5 Kinase (Cdk5_Kin)	Proline-dependent serine/threonine kinase group (Pro_ST_kin)	T570	STSTISStPRKRRKR	3.5974
39877	0.529	0.04077	PKC alpha/beta/gamma (PKC_common)	Basophilic serine/threonine kinase (Baso_ST_kin)	T145	IGAHLTPtKKRRKNK	5.7815
39877	0.669	0.04963	Cdc2 Kinase (Cdc2_Kin)	Proline-dependent serine/threonine kinase group (Pro_ST_kin)	T145	IGAHLTPtKKRRKNK	5.7815
39877	0.608	0.03818	Cdk5 Kinase (Cdk5_Kin)	Proline-dependent serine/threonine kinase group (Pro_ST_kin)	T145	IGAHLTPtKKRRKNK	5.7815
40100	0.619	0.00908	AMP_Kinase (AMPK)	Basophilic serine/threonine kinase (Baso_ST_kin)	S31	GVIPRTNsAAPSSTT	1.1681
40100	0.639	0.02085	Akt Kinase (Akt_Kin)	Basophilic serine/threonine kinase (Baso_ST_kin)	S31	GVIPRTNsAAPSSTT	1.1681
40100	0.577	0.03294	14-3-3 Mode 1 (1433_m1)	Phosphoserine/threonine binding group (pST_bind)	S31	GVIPRTNsAAPSSTT	1.1681
40100	0.638	0.01242	AMP_Kinase (AMPK)	Basophilic serine/threonine kinase (Baso_ST_kin)	T38	SAAPSSTtRLHFFGG	1.4059
40108	0.361	0.00129	PKC alpha/beta/gamma (PKC_common)	Basophilic serine/threonine kinase (Baso_ST_kin)	T486	SRSAFRAtMREFNLY	2.1967
40108	0.42	0.01044	PKC delta PKC_delta)	Basophilic serine/threonine kinase (Baso_ST_kin)	T486	SRSAFRAtMREFNLY	2.1967
40108	0.415	0.00526	PKC epsilon (PKC_epsilon)	Basophilic serine/threonine kinase (Baso_ST_kin)	T486	SRSAFRAtMREFNLY	2.1967
40108	0.565	0.02894	Protein Kinase A (PKA_Kin)	Basophilic serine/threonine kinase (Baso_ST_kin)	T486	SRSAFRAtMREFNLY	2.1967
40285	0.521	0.01699	Casein Kinase 2 (Casn_Kin2)	Acidophilic serine/threonine kinase group (Acid_ST_kin)	S342	TNKAQQEsERNELSK	5.2176
40355	0.547	0.01663	ATM Kinase (ATM_Kin)	DNA damage kinase group (DNA_dam_kin)	S907	GGGEGAGsQSPKTTE	1.1018
40355	0.476	0.00493	DNA PK (DNA_PK)	DNA damage kinase group (DNA_dam_kin)	S907	GGGEGAGsQSPKTTE	1.1018
40394	0.7	0.03118	AMP_Kinase (AMPK)	Basophilic serine/threonine kinase (Baso_ST_kin)	T502	GGLRQFLtMSGVFVI	0.31
40394	0.482	0.01963	PKC mu (PKC_mu)	Basophilic serine/threonine kinase (Baso_ST_kin)	T502	GGLRQFLtMSGVFVI	0.31
40522	0.524	0.03781	PKC alpha/beta/gamma (PKC_common)	Basophilic serine/threonine kinase (Baso_ST_kin)	S1161	LALAKIAsVQRKTVK	0.5475
40522	0.477	0.03541	PKC delta PKC_delta)	Basophilic serine/threonine kinase (Baso_ST_kin)	S1161	LALAKIAsVQRKTVK	0.5475
40642	0.422	0.01097	Casein Kinase 1 (Casn_Kin1)	Acidophilic serine/threonine kinase group (Acid_ST_kin)	S461	KRSSSSAsLDTAPVN	0.8264
40642	0.442	0.0161	PKC delta PKC_delta)	Basophilic serine/threonine kinase (Baso_ST_kin)	S461	KRSSSSAsLDTAPVN	0.8264
40642	0.515	0.00926	DNA PK (DNA_PK)	DNA damage kinase group (DNA_dam_kin)	S461	KRSSSSAsLDTAPVN	0.8264
40642	0.715	0.0383	AMP_Kinase (AMPK)	Basophilic serine/threonine kinase (Baso_ST_kin)	S459	FSKRSSSsASLDTAP	0.6158
40688	0.704	0.04879	Aurora A (AuroA)	Basophilic serine/threonine kinase (Baso_ST_kin)	S553	QSTPQRQsQASPPTL	2.4424
40688	0.628	0.01641	Aurora B (AuroB)	Basophilic serine/threonine kinase (Baso_ST_kin)	S553	QSTPQRQsQASPPTL	2.4424
40688	0.589	0.02877	DNA PK (DNA_PK)	DNA damage kinase group (DNA_dam_kin)	S553	QSTPQRQsQASPPTL	2.4424
40734	0.71	0.0354	AMP_Kinase (AMPK)	Basophilic serine/threonine kinase (Baso_ST_kin)	S54	SPVRRVPsNRTPTNP	1.6638
40734	0.506	0.0171	CDK1 motif 1-[ST]Px[KR]x (CDK1_1)	Proline-dependent serine/threonine kinase group (Pro_ST_kin)	T57	RRVPSNRtPTNPVLL	4.0315
40734	0.478	0.01514	CDK1 motif 2-[ST]PxxK (CDK1_2)	Proline-dependent serine/threonine kinase group (Pro_ST_kin)	T57	RRVPSNRtPTNPVLL	4.0315
40734	0.465	0.01094	14-3-3 Mode 1 (1433_m1)	Phosphoserine/threonine binding group (pST_bind)	T59	VPSNRTPtNPVLLDV	1.4146
40734	0.521	0.04991	PLK1 Kinase (PLK1)	Acidophilic serine/threonine kinase group (Acid_ST_kin)	T67	NPVLLDVtTRSRHAF	1.5529
40776	0.307	9e-05	Akt Kinase (Akt_Kin)	Basophilic serine/threonine kinase (Baso_ST_kin)	T435	TNRGRKStFPFGISL	1.0277
40776	0.48	0.00404	Aurora A (AuroA)	Basophilic serine/threonine kinase (Baso_ST_kin)	T435	TNRGRKStFPFGISL	1.0277
40776	0.611	0.01378	Aurora B (AuroB)	Basophilic serine/threonine kinase (Baso_ST_kin)	T435	TNRGRKStFPFGISL	1.0277
40776	0.418	0.00998	PKC delta PKC_delta)	Basophilic serine/threonine kinase (Baso_ST_kin)	T435	TNRGRKStFPFGISL	1.0277
40776	0.447	0.01079	PKC epsilon (PKC_epsilon)	Basophilic serine/threonine kinase (Baso_ST_kin)	T435	TNRGRKStFPFGISL	1.0277
40776	0.422	0.00627	Protein Kinase A (PKA_Kin)	Basophilic serine/threonine kinase (Baso_ST_kin)	T435	TNRGRKStFPFGISL	1.0277
40776	0.346	0.00265	14-3-3 Mode 1 (1433_m1)	Phosphoserine/threonine binding group (pST_bind)	T435	TNRGRKStFPFGISL	1.0277
40903	0.554	0.02829	Casein Kinase 2 (Casn_Kin2)	Acidophilic serine/threonine kinase group (Acid_ST_kin)	S10	SGHRWGDsDSSDEDD	1.5222
41009	0.66	0.01737	AMP_Kinase (AMPK)	Basophilic serine/threonine kinase (Baso_ST_kin)	S363	RVMSRRNsAESSSST	2.3552
41009	0.63	0.01876	Akt Kinase (Akt_Kin)	Basophilic serine/threonine kinase (Baso_ST_kin)	S363	RVMSRRNsAESSSST	2.3552
41009	0.545	0.00906	Aurora A (AuroA)	Basophilic serine/threonine kinase (Baso_ST_kin)	S363	RVMSRRNsAESSSST	2.3552
41009	0.694	0.03363	Aurora B (AuroB)	Basophilic serine/threonine kinase (Baso_ST_kin)	S363	RVMSRRNsAESSSST	2.3552
41009	0.69	0.00907	Clk2 Kinase (Clk2_Kin)	Basophilic serine/threonine kinase (Baso_ST_kin)	S363	RVMSRRNsAESSSST	2.3552
41009	0.372	0.00352	Protein Kinase A (PKA_Kin)	Basophilic serine/threonine kinase (Baso_ST_kin)	S363	RVMSRRNsAESSSST	2.3552
41009	0.585	0.03566	14-3-3 Mode 1 (1433_m1)	Phosphoserine/threonine binding group (pST_bind)	S363	RVMSRRNsAESSSST	2.3552
41009	0.511	0.01464	Casein Kinase 2 (Casn_Kin2)	Acidophilic serine/threonine kinase group (Acid_ST_kin)	T380	LGELEPDtVEDDFEG	1.8333
41009	0.511	0.00866	DNA PK (DNA_PK)	DNA damage kinase group (DNA_dam_kin)	T380	LGELEPDtVEDDFEG	1.8333
41074	0.68	0.02928	Aurora B (AuroB)	Basophilic serine/threonine kinase (Baso_ST_kin)	S79	RWRMNKFsRGGARGK	1.0201
41311	0.638	0.04274	CDK1 motif 1-[ST]Px[KR]x (CDK1_1)	Proline-dependent serine/threonine kinase group (Pro_ST_kin)	S277	VRNPNRFsPSVLKED	0.8011
41311	0.618	0.04247	CDK1 motif 2-[ST]PxxK (CDK1_2)	Proline-dependent serine/threonine kinase group (Pro_ST_kin)	S277	VRNPNRFsPSVLKED	0.8011
41311	0.668	0.04925	Cdc2 Kinase (Cdc2_Kin)	Proline-dependent serine/threonine kinase group (Pro_ST_kin)	S277	VRNPNRFsPSVLKED	0.8011
41311	0.635	0.04803	Cdk5 Kinase (Cdk5_Kin)	Proline-dependent serine/threonine kinase group (Pro_ST_kin)	S277	VRNPNRFsPSVLKED	0.8011
41424	0.485	0.00262	Akt Kinase (Akt_Kin)	Basophilic serine/threonine kinase (Baso_ST_kin)	S138	STDGRRLsMPSATDY	1.0172
41424	0.261	9e-05	Aurora A (AuroA)	Basophilic serine/threonine kinase (Baso_ST_kin)	S138	STDGRRLsMPSATDY	1.0172
41424	0.346	0.00038	Aurora B (AuroB)	Basophilic serine/threonine kinase (Baso_ST_kin)	S138	STDGRRLsMPSATDY	1.0172
41424	0.522	0.0142	Calmodulin dependent Kinase 2 (Cam_Kin2)	Basophilic serine/threonine kinase (Baso_ST_kin)	S138	STDGRRLsMPSATDY	1.0172
41424	0.284	0.00087	Protein Kinase A (PKA_Kin)	Basophilic serine/threonine kinase (Baso_ST_kin)	S138	STDGRRLsMPSATDY	1.0172
41424	0.33	0.00212	14-3-3 Mode 1 (1433_m1)	Phosphoserine/threonine binding group (pST_bind)	S138	STDGRRLsMPSATDY	1.0172
41442	0.745	0.04975	Aurora B (AuroB)	Basophilic serine/threonine kinase (Baso_ST_kin)	S622	MSGLSRIsDADISIF	1.1879
41442	0.504	0.04874	Casein Kinase 1 (Casn_Kin1)	Acidophilic serine/threonine kinase group (Acid_ST_kin)	S633	ISIFSDLsRKIGNVS	1.1613
41453	0.625	0.01018	AMP_Kinase (AMPK)	Basophilic serine/threonine kinase (Baso_ST_kin)	T133	NDLKRRDtDTTDPTS	3.7627
41453	0.647	0.02301	Akt Kinase (Akt_Kin)	Basophilic serine/threonine kinase (Baso_ST_kin)	T133	NDLKRRDtDTTDPTS	3.7627
41453	0.544	0.00895	Aurora A (AuroA)	Basophilic serine/threonine kinase (Baso_ST_kin)	T133	NDLKRRDtDTTDPTS	3.7627
41453	0.492	0.00392	Aurora B (AuroB)	Basophilic serine/threonine kinase (Baso_ST_kin)	T133	NDLKRRDtDTTDPTS	3.7627
41453	0.547	0.02234	Calmodulin dependent Kinase 2 (Cam_Kin2)	Basophilic serine/threonine kinase (Baso_ST_kin)	T133	NDLKRRDtDTTDPTS	3.7627
41453	0.385	0.00415	Protein Kinase A (PKA_Kin)	Basophilic serine/threonine kinase (Baso_ST_kin)	T133	NDLKRRDtDTTDPTS	3.7627
41453	0.601	0.04148	14-3-3 Mode 1 (1433_m1)	Phosphoserine/threonine binding group (pST_bind)	T133	NDLKRRDtDTTDPTS	3.7627
41497	0.484	0.00962	Casein Kinase 2 (Casn_Kin2)	Acidophilic serine/threonine kinase group (Acid_ST_kin)	S621	TLETEEVsSDDWIEA	1.4753
41497	0.508	0.04623	PLK1 Kinase (PLK1)	Acidophilic serine/threonine kinase group (Acid_ST_kin)	S621	TLETEEVsSDDWIEA	1.4753
41497	0.52	0.01686	Casein Kinase 2 (Casn_Kin2)	Acidophilic serine/threonine kinase group (Acid_ST_kin)	S622	LETEEVSsDDWIEAK	0.8957
42716	0.557	0.0075	Akt Kinase (Akt_Kin)	Basophilic serine/threonine kinase (Baso_ST_kin)	S42	PVPRRFAsFSMESLK	0.3085
42716	0.479	0.00634	Calmodulin dependent Kinase 2 (Cam_Kin2)	Basophilic serine/threonine kinase (Baso_ST_kin)	S42	PVPRRFAsFSMESLK	0.3085
42716	0.82	0.03823	Clk2 Kinase (Clk2_Kin)	Basophilic serine/threonine kinase (Baso_ST_kin)	S42	PVPRRFAsFSMESLK	0.3085
42716	0.527	0.01801	Protein Kinase A (PKA_Kin)	Basophilic serine/threonine kinase (Baso_ST_kin)	S42	PVPRRFAsFSMESLK	0.3085
42716	0.489	0.01402	14-3-3 Mode 1 (1433_m1)	Phosphoserine/threonine binding group (pST_bind)	S42	PVPRRFAsFSMESLK	0.3085
49147	0.679	0.04902	CDK1 motif 1-[ST]Px[KR]x (CDK1_1)	Proline-dependent serine/threonine kinase group (Pro_ST_kin)	T36	RDFATLStPEVLKEV	0.7265
49147	0.661	0.04914	CDK1 motif 2-[ST]PxxK (CDK1_2)	Proline-dependent serine/threonine kinase group (Pro_ST_kin)	T36	RDFATLStPEVLKEV	0.7265
52462	0.636	0.01786	Aurora B (AuroB)	Basophilic serine/threonine kinase (Baso_ST_kin)	S2288	QKVTQRTsHASQAPY	1.5992
